# Supplementary material
Source: HighWire-hosted journal article supplement (https://gut.bmj.com/content/68/5/829)
Supplement: inline-supplementary-material-1 [file inline-supplementary-material-1.pdf]

## Supplemental Tables

**Table S1:** Demographic information of PD patients (N=6) and HC (N=6).

| ID       | Age | Gender | Race             | BMI | PD Duration (Years) | UPDRS* | HY STAGE** | Bowel Habit Score*** | Bristol Stool Scale | L-Dopa Dosage Strength | L-Dopa Dosage Frequency**** | Medications                                           |
|----------|-----|--------|------------------|-----|---------------------|--------|------------|----------------------|---------------------|------------------------|-----------------------------|-------------------------------------------------------|
| PD1      | 73  | Female | Caucasian        | 27  | 12                  | 40     | 2          | 1                    | 3                   | 25/100                 | 4.5                         | None                                                  |
| PD2      | 63  | Male   | Caucasian        | 27  | 2                   | 35     | 2          | 3                    | 3                   | 25/100                 | 3                           | None                                                  |
| PD3      | 57  | Female | Caucasian        | 18  | 22                  | 21     | 2          | 0                    | 2                   | 25/100                 | 10                          | None                                                  |
| PD4      | 55  | Male   | Caucasian        | 24  | 6                   | 27     | 2          | 3                    | 3                   | 25/100                 | 8                           | 325mg aspirin daily                                   |
| PD5      | 57  | Male   | Caucasian        | 24  | 2                   | 27     | 2          | 0                    | 4                   | None                   | None                        | Sertraline 150 mg daily and bupropion XL 300 mg daily |
| PD6      | 58  | Male   | Caucasian        | 24  | 4                   | 17     | 2          | 1                    | 3                   | None                   | None                        | None                                                  |
| Control1 | 42  | Male   | Caucasian        | 25  | -                   | -      | -          | -                    | -                   | -                      | -                           | None                                                  |
| Control2 | 41  | Female | African American | 28  | -                   | -      | -          | -                    | -                   | -                      | -                           | None                                                  |
| Control3 | 72  | Male   | Caucasian        | 24  | -                   | -      | -          | -                    | -                   | -                      | -                           | 81mg aspirin daily                                    |
| Control4 | 70  | Female | Caucasian        | 23  | -                   | -      | -          | -                    | -                   | -                      | -                           | 81 mg aspirin daily                                   |
| Control5 | 57  | Female | Caucasian        | 22  | -                   | -      | -          | -                    | -                   | -                      | -                           | None                                                  |
| Control6 | 53  | Female | Caucasian        | 25  | -                   | -      | -          | -                    | -                   | -                      | -                           | Fluoxetine 20 mg; levothyroxine; methylphenidate 5 mg |

\*Unified Parkinson Disease Rating Scale, \*\*Hoehn and Yahr Stage, \*\*\*Gastrointestinal Symptom Bowel Habit Score: low to high constipation occurrence (0-10): constipation requiring treatment with score of greater than 5; Bristol Stool Scale is a diagnostic medical tool designed to classify the form of human feces into seven categories: Type 1 is severe constipation, type 2 is mild constipation, types 3 and 4 are ideal stools as they are easy to defecate while not containing excess liquid, type 5 lacks fiber, and types 6 and 7 indicate diarrhea; \*\*\*\*Total Number of L-Dopa Tablets consumed per day, BMI = Body Mass Index, PD = Parkinson's disease, (-) = data not collected. Age, gender and BMI did not differ significantly between PD and HC cases. No Probiotics or Antibiotics were taken. PD patients recruited for this study had no clinically significant constipation based on either their Bristol Stool Score (majority scored 3-4) or structured questionnaire - where patients were asked to rate (0=no difficulty; 10=most severe difficulty) regarding their difficulty in Bowel Habit Score [constipation] and none rated difficulty more than 3. Indeed, the only patient who's Bristol Stool Score was 2, rated his Bowel Habit Score as 0. Also, none of the patients took laxatives. We specifically selected these patients to exclude these potential confounding factors.

| Table S2. Human study correlations between leaky gut (Percent Sucralose) and other factors. |                                               |               |           |
|---------------------------------------------------------------------------------------------|-----------------------------------------------|---------------|-----------|
|                                                                                             | Correlations with Percent Sucralose Excretion | P-Value       | Pearson R |
| Demographics                                                                                | Age of Subjects                               | 0.6211        | 0.159     |
|                                                                                             | BMI of Subjects                               | 0.0809        | -0.523    |
| Barrier Impairments                                                                         | ZO-1 Scoring                                  | 0.1777        | -0.417    |
| Endotoxin                                                                                   | LBP Levels in Plasma                          | 0.4433        | -0.274    |
| Cell Counts                                                                                 | Number of TLR4+ Cells                         | 0.3170        | 0.316     |
|                                                                                             | Number of CD3+ Cells                          | 0.1219        | 0.471     |
| Gene Expression                                                                             | CLD1                                          | 0.1152        | 0.530     |
|                                                                                             | IFNB1                                         | 0.0545        | 0.623     |
|                                                                                             | IFNG                                          | 0.0715        | 0.592     |
|                                                                                             | IL17A                                         | 0.0528        | 0.626     |
|                                                                                             | IL1B                                          | <b>0.0299</b> | 0.682     |
|                                                                                             | CCL5                                          | 0.0702        | 0.594     |
|                                                                                             | CCR5                                          | <b>0.0249</b> | 0.698     |
|                                                                                             | IRAK2                                         | 0.0817        | 0.576     |
|                                                                                             | TOLLIP                                        | <b>0.0231</b> | -0.704    |
|                                                                                             | TLR4                                          | <b>0.0305</b> | 0.680     |
|                                                                                             | DSG3                                          | 0.0586        | 0.615     |
|                                                                                             | IL7R                                          | <b>0.0354</b> | 0.666     |
|                                                                                             | IL8                                           | 0.1168        | 0.528     |

| Table S3. Human study correlations between intestinal barrier dysfunction (ZO-1 scoring data) and other factors. |                                               |               |           |
|------------------------------------------------------------------------------------------------------------------|-----------------------------------------------|---------------|-----------|
|                                                                                                                  | Correlations with Percent Sucralose Excretion | P-Value       | Pearson R |
| Demographics                                                                                                     | Age of Subjects                               | 0.740         | -0.107    |
|                                                                                                                  | BMI of Subjects                               | 0.700         | -0.124    |
| Endotoxin                                                                                                        | LBP Levels in Plasma                          | <b>0.003</b>  | 0.831     |
| Cell Counts                                                                                                      | Number of TLR4+ Cells                         | 0.142         | -0.450    |
|                                                                                                                  | Number of CD3+ Cells                          | 0.149         | -0.442    |
| Gene Expression                                                                                                  | CLD1                                          | 0.053         | -0.626    |
|                                                                                                                  | IFNB1                                         | <b>0.014</b>  | -0.741    |
|                                                                                                                  | IFNG                                          | <b>0.034</b>  | -0.670    |
|                                                                                                                  | IL17A                                         | <b>0.025</b>  | -0.698    |
|                                                                                                                  | IL1B                                          | <b>0.016</b>  | -0.734    |
|                                                                                                                  | CCL5                                          | <b>0.008</b>  | -0.777    |
|                                                                                                                  | CCR5                                          | <b>0.019</b>  | -0.721    |
|                                                                                                                  | IRAK2                                         | <b>0.012</b>  | -0.755    |
|                                                                                                                  | TOLLIP                                        | 0.068         | 0.598     |
|                                                                                                                  | TLR4                                          | <b>0.042</b>  | -0.649    |
|                                                                                                                  | DSG3                                          | <b>0.0003</b> | -0.905    |
|                                                                                                                  | IL7R                                          | <b>0.009</b>  | -0.769    |
|                                                                                                                  | IL8                                           | 0.090         | -0.563    |

**Table S4. List of Log2FoldChange individual short-chain-fatty-acid (SCFA) genera with decreased abundance between healthy control and Parkinson's disease human subjects in both the sigmoid mucosa and feces.**

| Mucosa Genus SCFA                       | Log2FC       | Abundance Mean, HC | Abundance Mean, PD |
|-----------------------------------------|--------------|--------------------|--------------------|
| <i>Dorea</i>                            | -2.458917197 | 280.4              | 51                 |
| <i>Lachnospira</i>                      | -0.789294951 | 60.2               | 34.8               |
| <i>Faecalibacterium</i>                 | -0.746547421 | 632.8              | 377.2              |
| <i>Blautia</i>                          | -0.40729844  | 603.2              | 454.8              |
| <i>Coprococcus</i>                      | -0.372754773 | 79.2               | 61.2               |
| <i>f_Lachnospiraceae.Other</i>          | -0.297115401 | 51.4               | 41.8               |
| <i>f_Lachnospiraceae.g_Unclassified</i> | -0.295107112 | 564                | 459.7              |
| <i>Roseburia</i>                        | -0.171450856 | 189.2              | 168                |
| Feces Genus SCFA                        | Log2FC       | Abundance Mean, HC | Abundance Mean, PD |
| <i>Roseburia</i>                        | -1.839383776 | 300.6              | 84                 |
| <i>Anaerostipes</i>                     | -1.230297619 | 24.4               | 10.4               |
| <i>f_Lachnospiraceae.g_Other</i>        | -0.808270628 | 78.8               | 45                 |
| <i>Blautia</i>                          | -0.787669034 | 666                | 385.8              |
| <i>Faecalibacterium</i>                 | -0.629819571 | 1071.4             | 692.4              |
| <i>Coprococcus</i>                      | -0.588685587 | 116.4              | 77.4               |
| <i>f_Lachnospiraceae.g_Unclassified</i> | -0.450692995 | 609                | 445.6              |
| <i>Lachnospira</i>                      | -0.38766106  | 34.8               | 26.6               |

N=6 subjects/group. (f) = family or (g) = genus taxonomic level. (HC) = healthy control; (PD) = Parkinson's disease. Log2FC = log2 fold change: (abundance mean PD/ abundance mean HC). SCFA = short chain fatty acid.

**Table S5. Group analysis of similarity (ANOSIM) results for cecum mucosa and cecum content.**

| Comparisons                        | Taxonomic level | Global <i>R</i> | <i>P</i> -value |
|------------------------------------|-----------------|-----------------|-----------------|
| <b>Cecum Mucosa</b>                |                 |                 |                 |
| WT.Vehicle vs. WT.Rotenone         | Genus           | 0.664           | <b>0.001</b>    |
| TLR4KO.Vehicle vs. TLR4KO.Rotenone | Genus           | 0.760           | <b>0.001</b>    |
| WT.Vehicle vs. TLR4KO.Vehicle      | Genus           | 0.580           | <b>0.001</b>    |
| WT.Rotenone vs. TLR4KO.Rotenone    | Genus           | 0.364           | <b>0.001</b>    |
| <b>Cecum Content</b>               |                 |                 |                 |
| WT.Vehicle vs. WT.Rotenone         | Genus           | 0.512           | <b>0.001</b>    |
| TLR4KO.Vehicle vs. TLR4KO.Rotenone | Genus           | 0.870           | <b>0.001</b>    |
| WT.Vehicle vs. TLR4KO.Vehicle      | Genus           | 0.531           | <b>0.001</b>    |
| WT.Rotenone vs. TLR4KO.Rotenone    | Genus           | 0.206           | <b>0.012</b>    |

*P*-value =  $P < 0.05$ ; Global *R* comparison was based on ANOSIM performed within the software package Primer7; *P*-values were calculated based on a permutational analysis, employing 999 permutations; square-root transformation.
